# Supplementary material for: Significant down-regulation of growth hormone receptor expression revealed as a new unfavorable prognostic factor in hepatitis C virus-related hepatocellular carcinoma
Source: PubMed Central journal article supplement — Clin Mol Hepatol. 2020 Dec 14;27(2):313–28. doi: 10.3350/cmh.2020.0247 (PMC8046631; doi:10.3350/cmh.2020.0247), 2020-12-14
Supplement: cmh-2020-0247-suppl2.pdf [file cmh-2020-0247-suppl2.pdf]

**Supplementary Table 2.** Differentially expressed genes in comparisons between tumor and ANT tissues in patients with HCV-related HCC down-regulated genes

| Annotation                                                                                                                                                                       | Normalized Intensity |           | Fold change<br>(T/ANT ratio) | Gene                   | Description                                                    |
|----------------------------------------------------------------------------------------------------------------------------------------------------------------------------------|----------------------|-----------|------------------------------|------------------------|----------------------------------------------------------------|
|                                                                                                                                                                                  | ANT                  | T         |                              |                        |                                                                |
| NM_017931.2                                                                                                                                                                      | 11794.398            | 5889.6681 | -2.0025574                   | TTC38                  | tetratricopeptide repeat domain 38                             |
| NM_006459.3,NM_001100626.1                                                                                                                                                       | 1309.0339            | 640.57011 | -2.043545                    | ERLIN1                 | ER lipid raft associated 1                                     |
| NM_032470.3,NM_019105.6 XM_003960362.1 NR_001284.2                                                                                                                               | 371.29253            | 178.70647 | -2.0776669                   | TNXB LOC101060681 TNXA | tenascin XB tenascin-X-like tenascin XA (pseudogene)           |
| NM_001242401.3,NM_001242406.2,NM_001242405.2,NM_001242404.2,NM_001242403.2,NM_001242402.2,NM_001242400.2,NM_001242399.2,NM_000163.4,NM_001242462.1,NM_001242461.1,NM_001242460.1 | 6155.9549            | 2911.379  | -2.1144464                   | GHR                    | growth hormone receptor                                        |
| NM_015675.3                                                                                                                                                                      | 15820.061            | 7446.8692 | -2.1243908                   | GADD45B                | growth arrest and DNA-damage-inducible, beta                   |
| NM_003407.3                                                                                                                                                                      | 2497.061             | 1163.1494 | -2.1468101                   | ZFP36                  | ZFP36 ring finger protein                                      |
| NM_012084.3                                                                                                                                                                      | 641.94294            | 294.9589  | -2.176381                    | GLUD2                  | glutamate dehydrogenase 2                                      |
| NM_005891.2                                                                                                                                                                      | 2130.0591            | 975.85903 | -2.1827529                   | ACAT2                  | acetyl-CoA acetyltransferase 2                                 |
| NM_001198688.1,NM_001198687.1,NM_001003680.3                                                                                                                                     | 878.5322             | 395.38734 | -2.2219533                   | LEPR                   | leptin receptor                                                |
| NM_018286.2,NM_001099640.1                                                                                                                                                       | 567.41152            | 255.00551 | -2.2250969                   | TMEM100                | transmembrane protein 100                                      |
| NM_001220496.1,NM_001220494.1,NM_080661.3                                                                                                                                        | 1712.1736            | 761.24961 | -2.2491618                   | GLYATL1                | glycine-N-acetyltransferase-like 1                             |
| NM_016546.2                                                                                                                                                                      | 3914.6039            | 1732.8488 | -2.2590568                   | C1RL                   | complement component 1, r subcomponent-like                    |
| NM_001008410.1,NM_182915.2,NM_018234.2                                                                                                                                           | 1816.2602            | 790.96293 | -2.2962646                   | STEAP3                 | STEAP family member 3, metalloreductase                        |
| NM_001164664.1,NM_015183.2                                                                                                                                                       | 244.55183            | 104.29258 | -2.3448631                   | MAST4                  | microtubule associated serine/threonine kinase family member 4 |
| NM_015002.2,NM_033624.2                                                                                                                                                          | 1447.5482            | 616.02869 | -2.3498064                   | FBXO21                 | F-box protein 21                                               |
| NM_152766.3                                                                                                                                                                      | 3529.6956            | 1502.0057 | -2.3499881                   | TMEM256                | transmembrane protein 256                                      |
| NM_001256307.1,NM_001256306.1,NM_001256305.1,NM_001256301.1,NM_001145816.2,NM_000860.5                                                                                           | 5514.9816            | 2342.4948 | -2.3543197                   | HPGD                   | hydroxyprostaglandin dehydrogenase 15-(NAD)                    |
| NM_001130410.1,NM_001607.3,NR_024024.1                                                                                                                                           | 3376.5324            | 1431.9937 | -2.357924                    | ACAA1                  | acetyl-CoA acyltransferase 1                                   |

Supplementary Table 2. Continued

| Annotation                                                                                                                                                                                                                                                                                                                                                                    | Normalized Intensity |           | Fold change<br>(T/ANT ratio) | Family with sequence similarity                                                                        |
|-------------------------------------------------------------------------------------------------------------------------------------------------------------------------------------------------------------------------------------------------------------------------------------------------------------------------------------------------------------------------------|----------------------|-----------|------------------------------|--------------------------------------------------------------------------------------------------------|
|                                                                                                                                                                                                                                                                                                                                                                               | ANT                  | T         |                              |                                                                                                        |
| NM_176782.2                                                                                                                                                                                                                                                                                                                                                                   | 1431.7172            | 606.31171 | -2.361355                    | family with sequence similarity 151, member A                                                          |
| NM_031481.1                                                                                                                                                                                                                                                                                                                                                                   | 6928.4984            | 2905.8682 | -2.3843126                   | solute carrier family 25 (glutamate carrier), member 18                                                |
| NM_000320.2                                                                                                                                                                                                                                                                                                                                                                   | 1613.5368            | 672.9953  | -2.3975455                   | quinoid dihydropteridine reductase                                                                     |
| NM_001165921.1,NM_001165920.1,NM_000934.3                                                                                                                                                                                                                                                                                                                                     | 1941.7051            | 809.67212 | -2.3981376                   | serpin peptidase inhibitor, clade F (alpha-2 antiplasmin, pigment epithelium derived factor), member 2 |
| NM_001195803.1,NM_001195802.1,NM_001195800.1,NM_001195799.1,NM_001195798.1,NM_000527.4                                                                                                                                                                                                                                                                                        | 5736.9556            | 2384.1192 | -2.4063208                   | low density lipoprotein receptor                                                                       |
| NM_138424.1                                                                                                                                                                                                                                                                                                                                                                   | 349.26037            | 143.62497 | -2.4317524                   | kinesin family member 12                                                                               |
| NM_001127707.1,NM_001127706.1,NM_001127705.1,NM_001127704.1,NM_001127703.1,NM_001127702.1,NM_001127701.1,NM_001002236.2,NM_001002235.2,-NM_000295.4                                                                                                                                                                                                                           | 6065.4548            | 2488.9626 | -2.4369409                   | serpin peptidase inhibitor, clade A (alpha-1 antitrypsin, antitrypsin), member 1                       |
| NM_000177.4,NM_198252.2,NM_001127663.1,NM_001127662.1,NM_001127661.1,NM_001127660.1,NM_001127659.1,NM_001127658.1,NM_001127657.1,NM_001127656.1,NM_001127655.1,NM_001127654.1,NM_001127653.1,NM_001127652.1,NM_001127651.1,NM_001127650.1,NM_001127649.1,NM_001127648.1,NM_001127647.1,NM_001127646.1,NM_001127645.1,NM_001127644.1,NM_001127643.1,NM_001127642.1,NM_006100.3 | 5727.3208            | 2311.7035 | -2.4775326                   | gelsolin                                                                                               |
| NM_001271148.1,NM_001271147.1,NM_001271146.1,NM_001271145.1,NM_001271144.1,NM_006100.3                                                                                                                                                                                                                                                                                        | 1432.0167            | 572.98211 | -2.4992346                   | ST3 beta-galactoside alpha-2,3-sialyltransferase 6                                                     |
| NM_001033083.1                                                                                                                                                                                                                                                                                                                                                                | 1922.9666            | 768.62209 | -2.5018363                   | phenazine biosynthesis-like protein domain containing                                                  |
| NM_080825.3                                                                                                                                                                                                                                                                                                                                                                   | 653.40293            | 260.75723 | -2.5057903                   | chromosome 20 open reading frame 144                                                                   |
| NM_000670.3                                                                                                                                                                                                                                                                                                                                                                   | 20506.753            | 8168.7869 | -2.5103792                   | alcohol dehydrogenase 4 (class II), pi polypeptide                                                     |
| NM_001134707.1,NM_007101.3                                                                                                                                                                                                                                                                                                                                                    | 1667.2778            | 663.40057 | -2.5132294                   | sarcosine dehydrogenase                                                                                |
| NM_003641.3                                                                                                                                                                                                                                                                                                                                                                   | 5615.7337            | 2234.0237 | -2.5137306                   | interferon induced transmembrane protein 1                                                             |

Supplementary Table 2. Continued

| Annotation                                                                                          | Normalized Intensity |           | Fold change<br>(T/ANT ratio) | Gene         | Description                                                        |
|-----------------------------------------------------------------------------------------------------|----------------------|-----------|------------------------------|--------------|--------------------------------------------------------------------|
|                                                                                                     | ANT                  | T         |                              |              |                                                                    |
| NM_016337.2                                                                                         | 859.45601            | 338.31269 | -2.5404191                   | EVL          | Enah/Vasp-like                                                     |
| NM_003891.2,NM_001256134.1                                                                          | 3296.2612            | 1293.2011 | -2.5489162                   | PROZ         | protein Z, vitamin K-dependent plasma glycoprotein                 |
| XR_171578.1,XR_108661.1,<br>XR_133426.1                                                             | 3015.2836            | 1174.5784 | -2.56712                     | LOC100505985 | uncharacterized LOC100505985                                       |
| NM_152404.3                                                                                         | 375.76314            | 145.22391 | -2.5874743                   | UGT3A1       | UDP glycosyltransferase 3 family, polypeptide A1                   |
| NM_001193335.1,NM_017680.4                                                                          | 930.5568             | 359.27936 | -2.5900648                   | ASPN         | asporin                                                            |
| NM_004277.4,NM_001204052.1,<br>NM_001204051.1                                                       | 322.41284            | 124.39267 | -2.5918958                   | SLC25A27     | solute carrier family 25, member 27                                |
| NM_201541.1,NM_201540.1,NM_201539.1,NM_201538.1,NM_201537.1,NM_016250.2,NM_201536.1,<br>NM_201535.1 | 13522.47             | 5126.5176 | -2.6377496                   | NDRG2        | NDRG family member 2                                               |
| NM_001204963.1,NM_001204961.1,NM_002585.3                                                           | 278.82041            | 105.67334 | -2.6385122                   | PBX1         | pre-B-cell leukemia homeobox 1                                     |
| NM_005074.3                                                                                         | 1359.9811            | 511.85421 | -2.6569696                   | SLC17A1      | solute carrier family 17 (sodium phosphate), member 1              |
| NM_013410.3,NM_203464.2,<br>NM_001005353.2                                                          | 1598.949             | 599.32135 | -2.6679327                   | AK4          | adenylate kinase 4                                                 |
| NM_004673.3                                                                                         | 484.56681            | 179.78187 | -2.6953041                   | ANGPTL1      | angiotensin-like 1                                                 |
| NM_032219.2                                                                                         | 215.44837            | 79.363024 | -2.7147198                   | MFSD7        | major facilitator superfamily domain containing 7                  |
| NM_000229.1                                                                                         | 3932.0806            | 1443.1091 | -2.7247285                   | LCAT         | lecithin-cholesterol acyltransferase                               |
| NM_000067.2                                                                                         | 23699.453            | 8614.5664 | -2.7510907                   | CA2          | carbonic anhydrase II                                              |
| NM_020676.5                                                                                         | 1301.0226            | 470.39949 | -2.7657823                   | ABHD6        | abhydrolase domain containing 6                                    |
| NM_000242.2                                                                                         | 7695.338             | 2771.8021 | -2.7762942                   | MBL2         | mannose-binding lectin (protein C) 2, soluble                      |
| NM_001177433.1,NM_001177431.1,<br>,NM_001177428.1,NM_021625.4,<br>NM_147204.2                       | 2888.7859            | 1034.8313 | -2.7915524                   | TRPV4        | transient receptor potential cation channel, subfamily V, member 4 |
| NM_012342.2                                                                                         | 882.7321             | 315.79656 | -2.7952556                   | BAMBI        | BMP and activin membrane-bound inhibitor homolog (Xenopus laevis)  |

Supplementary Table 2. Continued

| Annotation                                                        | Normalized Intensity                                     |           | Fold change<br>(T/ANT ratio) | Gene       | Description                                                    |
|-------------------------------------------------------------------|----------------------------------------------------------|-----------|------------------------------|------------|----------------------------------------------------------------|
|                                                                   | ANT                                                      | T         |                              |            |                                                                |
| NM_001178137.1,NM_014912.4                                        | NP_00117608.1,NP_055727.3                                | 771.98814 | 275.77712                    | -2.799319  | CPEB3<br>cytoplasmic polyadenylation element binding protein 3 |
| NM_001243743.1,NM_000136.2                                        | NP_001230672.1,NP_000127.2                               | 504.20825 | 176.72393                    | -2.8530842 | FANCC<br>Fanconi anemia, complementation group C               |
| NM_001206961.1,NM_001206960.1,NM_015900.3                         | NP_001193890.1,NP_001193889.1,NP_056984.1                | 754.69898 | 262.08178                    | -2.8796317 | PLA1A<br>phospholipase A1 member A                             |
| NM_001010924.1                                                    | NP_001010924.1                                           | 581.63047 | 201.50766                    | -2.8863939 | FAM171A1<br>family with sequence similarity 171, member A1     |
| NM_021229.3                                                       | NP_067052.2                                              | 1297.3784 | 446.33116                    | -2.9067618 | NTN4<br>netrin 4                                               |
| NM_181712.4                                                       | NP_859063.3                                              | 246.88106 | 83.474139                    | -2.9575754 | KANK4<br>KN motif and ankyrin repeat domains 4                 |
| NM_006623.3                                                       | NP_006614.2                                              | 1075.3361 | 362.38033                    | -2.9674242 | PHGDH<br>phosphoglycerate dehydrogenase                        |
| NM_005252.3                                                       | NP_005243.1                                              | 9709.4447 | 3269.4143                    | -2.969781  | FOS<br>FBJ murine osteosarcoma viral oncogene homolog          |
| NM_000429.2                                                       | NP_000420.1                                              | 19342.161 | 6464.862                     | -2.9918909 | MATIA<br>methionine adenosyltransferase I, alpha               |
| NM_001242393.1,NM_001076552.2,NM_018677.3                         | NP_001229322.1,NP_001070020.2,NP_061147.1                | 2325.1607 | 775.78595                    | -2.9971679 | ACSS2<br>acyl-CoA synthetase short-chain family member 2       |
| NM_173054.2,NM_005045.3                                           | NP_774959.1,NP_005036.2                                  | 4928.8875 | 1644.2696                    | -2.9976152 | RELN<br>reelin                                                 |
| NM_133503.2,NM_001920.3,NM_504.2,NM_133505.2                      | NP_598010.1,NP_001911.1,NP_598011.1,NP_598012.1          | 3915.5927 | 1300.6857                    | -3.0104065 | DCN<br>decorin                                                 |
| NM_001199241.1,NM_001032998.1,NM_003937.2                         | NP_001186170.1,NP_001028170.1,NP_003928.1                | 3467.1998 | 1148.44                      | -3.0190517 | KYNU<br>kynureninase                                           |
| NR_027462.1,NR_027463.1,NM_001146280.1,NM_001040.3,NM_001146281.1 | -NP_001139752.1,NP_001031.2,NP_001139753.1               | 4605.6506 | 1525.328                     | -3.0194493 | SHBG<br>sex hormone-binding globulin                           |
| NM_031938.5,NM_001256400.1,NM_001256398.1,NM_001037290.2          | NP_114144.4,NP_001243329.1,NP_001243327.1,NP_001032367.2 | 1872.9536 | 614.31832                    | -3.0488324 | BCO2<br>beta-carotene oxygenase 2                              |
| NM_203417.1,NM_004414.5,NM_203418.1                               | NP_981962.1,NP_004405.3,NP_981963.1                      | 4206.758  | 1373.308                     | -3.0632298 | RCAN1<br>regulator of calcineurin 1                            |
| NM_003246.2                                                       | NP_003237.2                                              | 655.29331 | 211.5528                     | -3.0975402 | THBS1<br>thrombospondin 1                                      |
| NM_033071.3,NM_182961.3                                           | NP_149062.1,NP_892006.3                                  | 498.35889 | 159.99192                    | -3.1149003 | SYNE1<br>spectrin repeat containing, nuclear envelope 1        |

Supplementary Table 2. Continued

| Annotation                                                                                                                                                                                                  | Normalized Intensity                                                                                                                                                                                        |           | Fold change<br>(T/ANT ratio) |            |                                          |                                                                                                                                                                                      |
|-------------------------------------------------------------------------------------------------------------------------------------------------------------------------------------------------------------|-------------------------------------------------------------------------------------------------------------------------------------------------------------------------------------------------------------|-----------|------------------------------|------------|------------------------------------------|--------------------------------------------------------------------------------------------------------------------------------------------------------------------------------------|
|                                                                                                                                                                                                             | ANT                                                                                                                                                                                                         | T         |                              |            |                                          |                                                                                                                                                                                      |
| NM_003235.4                                                                                                                                                                                                 | NP_003226.4                                                                                                                                                                                                 | 4257.4329 | 1357.3547                    | -3.1365661 | TG                                       | thyroglobulin                                                                                                                                                                        |
| NM_001032365.2,NM_001032364.2,NM_013430.2,NM_005265.2,NM_199127.2                                                                                                                                           | NP_001027537.1,NP_001027536.1,NP_038347.2,NP_005256.2,NP_954578.2                                                                                                                                           | 1119.0697 | 356.194                      | -3.1417421 | GGT1 GGTLC2                              | gamma-glutamyltransferase 1 gamma-glutamyltransferase light chain 2                                                                                                                  |
| NM_001128203.1,NM_007069.3                                                                                                                                                                                  | NP_001121675.1,NP_009000.2                                                                                                                                                                                  | 381.4698  | 120.99986                    | -3.1526465 | PLA2G16                                  | phospholipase A2, group XVI                                                                                                                                                          |
| NM_002666.4,NM_001145311.1                                                                                                                                                                                  | NP_002657.3,NP_001138783.1                                                                                                                                                                                  | 414.10291 | 129.68364                    | -3.1931776 | PLIN1                                    | perilipin 1                                                                                                                                                                          |
| NM_000672.3                                                                                                                                                                                                 | NP_000663.1                                                                                                                                                                                                 | 16272.526 | 5084.9849                    | -3.2001129 | ADH6                                     | alcohol dehydrogenase 6 (class V)                                                                                                                                                    |
| NM_006206.4                                                                                                                                                                                                 | NP_006197.1                                                                                                                                                                                                 | 979.21989 | 304.75924                    | -3.2130934 | PDGFRA                                   | platelet-derived growth factor receptor, alpha polypeptide                                                                                                                           |
| NM_001242889.1,NM_001242888.1,NM_001242887.1,NM_001242886.1,NM_001082971.1,NM_000790.3                                                                                                                      | NP_001229818.1,NP_001229817.1,NP_001229816.1,NP_001229815.1,NP_001076440.1,NP_000781.1                                                                                                                      | 5073.7061 | 1575.2621                    | -3.2208647 | DDC                                      | dopa decarboxylase (aromatic L-amino acid decarboxylase)                                                                                                                             |
| NM_001261447.1,NM_001261448.1,NM_201592.2,NM_201591.2,NM_005277.4,NR_048571.1                                                                                                                               | NP_001248376.1,NP_001248377.1,NP_963886.1,NP_963885.1,NP_005268.1,-                                                                                                                                         | 422.31994 | 130.74774                    | -3.2300363 | GPM6A                                    | glycoprotein M6A                                                                                                                                                                     |
| NM_001024455.3                                                                                                                                                                                              | NP_001019626.1                                                                                                                                                                                              | 526.20086 | 161.58017                    | -3.2565929 | RGAG4                                    | retrotransposon gag domain containing 4                                                                                                                                              |
| NM_004022.2,NM_004018.2,NM_004017.2,NM_004016.2,NM_004013.2,NM_004006.2,NM_000109.3,NM_004020.3,NM_004023.2,NM_004021.2,NM_004015.2,NM_004007.2,NM_004014.2,NM_004012.3,NM_004011.3,NM_004010.3,NM_004009.3 | NP_004013.1,NP_004009.1,NP_004008.1,NP_004007.1,NP_004004.1,NP_003997.1,NP_000100.2,NP_004011.2,NP_004014.1,NP_004012.1,NP_004006.1,NP_003998.1,NP_004005.1,NP_004003.1,NP_004002.2,NP_004001.1,NP_004000.1 | 4546.1191 | 1369.1327                    | -3.3204371 | DMD                                      | dystrophin                                                                                                                                                                           |
| NM_024669.2                                                                                                                                                                                                 | NP_078945.2                                                                                                                                                                                                 | 486.4526  | 146.36051                    | -3.3236602 | ANKRD55                                  | ankyrin repeat domain 55                                                                                                                                                             |
| NR_003669.1 NM_005952.3 NM_175617.3 NM_005946.2 NM_005953.3 NM_005947.2 NR_001447.2 NM_005951.2                                                                                                             | - NP_005943.1 NP_783316.2 NP_005937.2 NP_005944.1 NP_005938.1 NP_005942.1                                                                                                                                   | 1198.6118 | 355.32001                    | -3.3733304 | MT1P1 MT1X MT1E MT1A MT2A MT1B MT1L MT1H | metallothionein 1I,<br>pseudogene metallothionein 1X metallothionein 1E metallothionein 1A metallothionein 2A metallothionein 1B metallothionein 1H<br>pseudogene metallothionein 1H |
| NM_001102654.1,NM_002527.4                                                                                                                                                                                  | NP_001096124.1,NP_002518.1                                                                                                                                                                                  | 671.48017 | 199.03069                    | -3.373752  | NTF3                                     | neurotrophin 3                                                                                                                                                                       |

Supplementary Table 2. Continued

| Annotation                                                              | Normalized Intensity                                                    |           | Fold change<br>(T/ANT ratio) |            |          |                                                                                    |
|-------------------------------------------------------------------------|-------------------------------------------------------------------------|-----------|------------------------------|------------|----------|------------------------------------------------------------------------------------|
|                                                                         | ANT                                                                     | T         |                              |            |          |                                                                                    |
| NM_000917.3,NM_001142596.1,NM_001142595.1,NM_001017962.2                | NP_000908.2,NP_001136068.1,NP_001136067.1,NP_001017962.1                | 488.12414 | 144.08352                    | -3.3877861 | P4HA1    | prolyl 4-hydroxylase, alpha polypeptide I                                          |
| NM_001018049.1,NM_002571.2                                              | NP_001018059.1,NP_002562.2                                              | 389.84221 | 114.63205                    | -3.4008135 | PAEP     | progesteragen-associated endometrial protein                                       |
| NM_006918.4,NM_001024956.2                                              | NP_008849.2,NP_001020127.1                                              | 13360.581 | 3889.042                     | -3.4354427 | SC5DL    | sterol-C5-desaturase (ERG3 delta-5-desaturase homolog, <i>S. cerevisiae</i> )-like |
| NM_006774.4,NM_001199219.1                                              | NP_006765.4,NP_001186148.1                                              | 5065.9221 | 1472.9572                    | -3.4392868 | INMT     | indolethylamine N-methyltransferase                                                |
| NM_000014.4                                                             | NP_000005.2                                                             | 952.37374 | 276.49788                    | -3.4444416 | A2M      | alpha-2-macroglobulin                                                              |
| NM_016205.2,NR_036641.1                                                 | NP_057289.1,-                                                           | 651.23948 | 187.56624                    | -3.4720506 | PDGFC    | platelet derived growth factor C                                                   |
| NM_001130715.1,NM_001130716.1,NM_016619.2                               | NP_001124187.1,NP_001124188.1,NP_057703.1                               | 1262.4688 | 361.40278                    | -3.4932459 | PLAC8    | placenta-specific 8                                                                |
| NM_018945.3                                                             | NP_061818.1                                                             | 777.13469 | 222.17001                    | -3.497928  | PDE7B    | phosphodiesterase 7B                                                               |
| NM_145739.2,NM_032523.3,NM_001201482.1,NM_001201481.1,NM_001201480.1    | NP_665682.1,NP_115912.1,NP_001188411.1,NP_001188410.1,NP_001188409.1    | 345.4992  | 98.335523                    | -3.513473  | OSBPL6   | oxysterol binding protein-like 6                                                   |
| NM_000767.4                                                             | NP_000758.1                                                             | 23938.48  | 6795.8671                    | -3.5225056 | CYP2B6   | cytochrome P450, family 2, subfamily B, polypeptide 6                              |
| NM_000270.3                                                             | NP_000261.2                                                             | 1032.3415 | 293.01659                    | -3.5231502 | PNP      | purine nucleoside phosphorylase                                                    |
| NM_001127710.1,NM_001127709.1,NM_001127708.1,NM_005807.3                | NP_001121182.1,NP_001121181.1,NP_001121180.1,NP_005798.2                | 21227.197 | 5961.9495                    | -3.5604455 | PRG4     | proteoglycan 4                                                                     |
| NM_001145320.1,NM_014694.3                                              | NP_001138792.1,NP_055509.2                                              | 1045.2012 | 290.74264                    | -3.594936  | ADAMTSL2 | ADAMTS-like 2                                                                      |
| NM_006169.2                                                             | NP_006160.1                                                             | 58060.646 | 16079.999                    | -3.6107369 | NNMT     | nicotinamide N-methyltransferase                                                   |
| NM_014883.3,NM_001265580.1,NM_001265579.1,NM_001265578.1,NM_001015045.2 | NP_055698.2,NP_001252509.1,NP_001252508.1,NP_001252507.1,NP_001015045.1 | 449.81396 | 124.33364                    | -3.6177977 | FAM13A   | family with sequence similarity 13, member A                                       |
| NM_01847.4,NM_001167749.1                                               | NP_060887.2,NP_001161221.1                                              | 534.72711 | 146.59818                    | -3.6475699 | ADCY10   | adenylate cyclase 10 (soluble)                                                     |
| NM_002899.3,NM_001130993.1,NM_001130992.1                               | NP_002890.2,NP_001124465.1,NP_001124464.1                               | 2040.0501 | 558.43519                    | -3.6531547 | RBP1     | retinol binding protein 1, cellular                                                |
| NM_014291.3                                                             | NP_055106.1                                                             | 643.62671 | 174.81688                    | -3.6817195 | GCAT     | glycine C-acyltransferase                                                          |

Supplementary Table 2. Continued

| Annotation                                                                | Normalized Intensity |           | Fold change<br>(T/ANT ratio) | Description                                                                                                                    |
|---------------------------------------------------------------------------|----------------------|-----------|------------------------------|--------------------------------------------------------------------------------------------------------------------------------|
|                                                                           | ANT                  | T         |                              |                                                                                                                                |
| NM_001074.2 NM_001144767.1,<br>NM_001075.4 NM_053039.1,<br>NM_001207004.1 | 10256.254            | 2736.5104 | -3.7479316                   | UGT2B7 UGT2B10 UGT2B28<br>UDP glucuronosyltransferase 2 fam-<br>ily, polypeptide B7 UDP glucuron-<br>osyltransferase 2 family, |
| NM_032709.2                                                               | 749.79354            | 199.99469 | -3.7490672                   | PYROXD2<br>pyridine nucleotide-disulphide<br>oxidoreductase domain 2                                                           |
| NM_021197.2                                                               | 355.58004            | 94.065857 | -3.780118                    | WFDC1<br>WAP four-disulfide core domain 1                                                                                      |
| NM_004616.2                                                               | 3618.1868            | 957.08034 | -3.780442                    | TSPAN8<br>tetraspanin 8                                                                                                        |
| NM_144488.4 NM_144489.2 NM_02<br>1106.3 NM_130795.2 NM_134427.1           | 2159.6426            | 564.92278 | -3.8228987                   | RG53<br>regulator of G-protein signaling 3                                                                                     |
| NM_001039752.3                                                            | 567.41839            | 147.03741 | -3.8590069                   | SLC22A10<br>solute carrier family 22, member 10                                                                                |
| NM_000767.4 NR_001278.1                                                   | 17121.551            | 4413.1684 | -3.8796506                   | CYP2B6 CYP2B7P1<br>cytochrome P450, family 2, subfamily<br>B, polypeptide 6 cytochrome P450,<br>family 2, subfamily B          |
| NM_001128085.1 NM_000049.2                                                | 461.80555            | 118.676   | -3.8913136                   | ASPA<br>aspartoacylase                                                                                                         |
| NM_000771.3                                                               | 9003.5322            | 2302.3244 | -3.9106271                   | CYP2C9<br>cytochrome P450, family 2, subfamily<br>C, polypeptide 9                                                             |
| NM_024605.3                                                               | 1332.7007            | 339.68089 | -3.9233903                   | ARHGAP10<br>Rho GTPase activating protein 10                                                                                   |
| NM_000668.4                                                               | 33570.594            | 8503.4877 | -3.9478617                   | ADH1B<br>alcohol dehydrogenase 1B (class I),<br>beta polypeptide                                                               |
| NM_054033.2 NM_004116.3                                                   | 610.40374            | 153.90215 | -3.9661808                   | FKBP1B<br>FK506 binding protein 1B, 12.6 kDa                                                                                   |
| NM_001528.2                                                               | 3299.7633            | 825.77665 | -3.9959514                   | HGFAC<br>HGF activator                                                                                                         |
| NM_152470.2 NM_001256758.1                                                | 659.0222             | 164.37102 | -4.0093575                   | RNF165<br>ring finger protein 165                                                                                              |
| NM_180991.4                                                               | 523.67395            | 130.50228 | -4.0127571                   | SLCO4C1<br>solute carrier organic anion trans-<br>porter family, member 4C1                                                    |
| NM_000301.3                                                               | 1064.479             | 263.76443 | -4.0357184                   | PLG<br>plasminogen                                                                                                             |
| NM_000769.1                                                               | 9056.0622            | 2230.1266 | -4.0607838                   | CYP2C19<br>cytochrome P450, family 2, subfamily<br>C, polypeptide 19                                                           |
| NM_202000.2 NM_005622.3                                                   | 4178.4363            | 1017.3065 | -4.1073522                   | ACSM3<br>acyl-CoA synthetase medium-chain<br>family member 3                                                                   |
| NM_001122848.2 NM_001122847.2,<br>NM_001206931.1 NM_003044.4              | 1216.3067            | 294.29242 | -4.1329868                   | SLC6A12<br>solute carrier family 6 (neurotrans-<br>mitter transporter, betaine/GABA),<br>member 12                             |



Supplementary Table 2. Continued

| Annotation                                                                            | Normalized Intensity                                        |           | Fold change<br>(T/ANT ratio) |                                                                                                             |
|---------------------------------------------------------------------------------------|-------------------------------------------------------------|-----------|------------------------------|-------------------------------------------------------------------------------------------------------------|
|                                                                                       | ANT                                                         | T         |                              |                                                                                                             |
| NM_020130.4                                                                           | NP_064515.1                                                 | 318.1123  | -4.1542617                   | C8orf4 chromosome 8 open reading frame 4                                                                    |
| NM_021800.2,NM_201262.1                                                               | NP_068572.1,NP_957714.1                                     | 103.06195 | -4.1643671                   | DNAJC12 DnaJ (Hsp40) homolog, subfamily C, member 12                                                        |
| NM_000050.4,NM_054012.3                                                               | NP_000041.2,NP_446464.1                                     | 3673.4962 | -4.2093401                   | ASS1 argininosuccinate synthase 1                                                                           |
| NM_001145252.1,NM_002621.2                                                            | NP_001138724.1,NP_002612.1                                  | 288.99392 | -4.2486772                   | CFP complement factor properdin                                                                             |
| NM_201648.2                                                                           | NP_964011.2                                                 | 3535.3028 | -4.260166                    | GLYAT glycine-N-acyltransferase                                                                             |
| NM_000078.2                                                                           | NP_000069.2                                                 | 338.82301 | -4.2775729                   | CETP cholesteryl ester transfer protein, plasma                                                             |
| NM_020872.1                                                                           | NP_065923.1                                                 | 89.154566 | -4.3292606                   | CNTN3 contactin 3 (plasmacytoma associated)                                                                 |
| NM_145870.2,NM_001513.3,<br>NM_145871.2                                               | NP_665877.1,NP_001504.2,<br>NP_665878.2                     | 274.09191 | -4.3625307                   | GSTZ1 glutathione S-transferase zeta 1                                                                      |
| NM_006632.3,NM_001098486.1                                                            | NP_006623.2,NP_001091956.1                                  | 1000.3194 | -4.4020217                   | SLC17A3 solute carrier family 17 (sodium phosphate), member 3                                               |
| NM_001190907.1,NM_001190906.1,N<br>M_005989.3                                         | NP_001177836.1,NP_001177835.1,NP_<br>005980.1               | 370.27196 | -4.4384421                   | AKR1D1 aldo-keto reductase family 1, member D1                                                              |
| NM_152349.2                                                                           | NP_689562.1                                                 | 206.10827 | -4.4714397                   | KRT222 keratin 222                                                                                          |
| NM_021154.3,NM_058179.2                                                               | NP_066977.1,NP_478059.1                                     | 3242.5353 | -4.4807465                   | PSAT1 phosphoserine aminotransferase 1                                                                      |
| NM_001114171.1,NM_006732.2                                                            | NP_001107643.1,NP_006723.2                                  | 513.95605 | -4.5758342                   | FOSB FBJ murine osteosarcoma viral oncogene homolog B                                                       |
| NM_152637.2                                                                           | NP_689850.2                                                 | 1248.2097 | -4.6768014                   | METTL7B methyltransferase like 7B                                                                           |
| NM_001199771.1,NM_002905.3 <br>NR_037658.1                                            | NP_001186700.1,NP_002896.2 -                                | 553.95728 | -4.8249286                   | RDH5 BLOC1S1-RDH5 retinol dehydrogenase 5 (11-cis/9-cis) BLOC1S1-RDH5 readthrough                           |
| NM_015837.2,NM_004108.2                                                               | NP_056652.1,NP_004099.2                                     | 411.3217  | -5.1577049                   | FCN2 ficolin (collagen/fibrinogen domain containing lectin) 2 (hucolin)                                     |
| NM_144646.3                                                                           | NP_653247.1                                                 | 439.51443 | -5.3387685                   | IGJ immunoglobulin J polypeptide, linker protein for immunoglobulin alpha and mu polypeptides               |
| NM_005953.3                                                                           | NP_005944.1                                                 | 4903.2893 | -5.3972258                   | MT2A metallothionein 2A                                                                                     |
| NM_152855.2,NM_020070.3 NM_00<br>1256296.1,NM_001178126.1 NR_02<br>4448.2 NR_029395.1 | NP_690594.1,NP_064455.1 NP_00124<br>3225.1,NP_001171597.1 - | 444.81177 | -5.4824981                   | IGLL1 IGLL5 GUSBP1 IGLL3P immunoglobulin lambda-like polypeptide 1 immunoglobulin lambda-like polypeptide 5 |



Supplementary Table 2. Continued

| Annotation                                | Normalized Intensity                      |                     | Fold change<br>(T/ANT ratio) | Gene      | Description                                                             |
|-------------------------------------------|-------------------------------------------|---------------------|------------------------------|-----------|-------------------------------------------------------------------------|
|                                           | ANT                                       | T                   |                              |           |                                                                         |
| NM_001190997.2,NM_016615.4                | NP_001177926.1,NP_057699.2                | 2031.6294 365.26825 | -5.5620203                   | SLC6A13   | solute carrier family 6 (neurotransmitter transporter, GABA), member 13 |
| NM_001100877.1,NM_001100876.1,NM_174933.3 | NP_001094347.1,NP_001094346.1,NP_777593.2 | 1097.5755 192.86634 | -5.6908605                   | PHYHD1    | phytanoyl-CoA dioxygenase domain containing 1                           |
| NM_001167930.1,NM_134470.3                | NP_001161402.1,NP_608273.1                | 1131.1978 188.88832 | -5.9887124                   | IL1RAP    | interleukin 1 receptor accessory protein                                |
| NM_001146006.1,NM_004970.2,NR_027389.1    | NP_001139478.1,NP_004961.1,-              | 3515.3608 579.14912 | -6.0698717                   | IGFALS    | insulin-like growth factor binding protein, acid labile subunit         |
| NM_016228.3,NM_182662.1                   | NP_057312.1,NP_872603.1                   | 6368.845 1043.315   | -6.1044318                   | AADAT     | aminoadipate aminotransferase                                           |
| NR_038343.2                               | -                                         | 954.47085 155.1764  | -6.1508765                   | MAG12-AS3 | MAG12 antisense RNA 3                                                   |
| NM_152338.3                               | NP_689551.2                               | 3127.8467 506.84676 | -6.1711881                   | ZG16      | zymogen granule protein 16                                              |
| NM_019844.3                               | NP_062818.1                               | 1796.45 290.30392   | -6.1881702                   | SLCO1B3   | solute carrier organic anion transporter family, member 1B3             |
| NM_001136503.1                            | NP_001129975.1                            | 4705.3917 759.27895 | -6.1971845                   | C19orf77  | chromosome 19 open reading frame 77                                     |
| NM_017460.5,NM_001202855.2                | NP_059488.2,NP_001189784.1                | 14183.301 2266.8655 | -6.25679                     | CYP3A4    | cytochrome P450, family 3, subfamily A, polypeptide 4                   |
| NM_144717.3                               | NP_653318.2                               | 728.89594 112.87426 | -6.4575923                   | IL20RB    | interleukin 20 receptor beta                                            |
| NM_000015.2                               | NP_000006.2                               | 8566.234 1270.6352  | -6.7416944                   | NAT2      | N-acetyltransferase 2 (arylamine N-acetyltransferase)                   |
| NM_016593.3                               | NP_057677.2                               | 5033.3289 733.19955 | -6.8648827                   | CYP39A1   | cytochrome P450, family 39, subfamily A, polypeptide 1                  |
| NM_002346.2,NM_001127213.1                | NP_002337.1,NP_001120685.1                | 2854.7492 406.65654 | -7.0200499                   | LY6E      | lymphocyte antigen 6 complex, locus E                                   |
| NM_001005783.1,NM_016527.2                | NP_001005783.1,NP_057611.1                | 18918.594 2658.7413 | -7.1156207                   | HAO2      | hydroxyacid oxidase 2 (long chain)                                      |
| NM_006829.2                               | NP_006820.1                               | 5744.5613 789.92997 | -7.2722412                   | C10orf116 | chromosome 10 open reading frame 116                                    |
| NM_001128432.1,NM_020973.3                | NP_001121904.1,NP_066024.1                | 12490.183 1695.2275 | -7.3678505                   | GBA3      | glucosidase, beta, acid 3 (cytosolic)                                   |
| NM_001136493.1,NM_032793.3                | NP_001129965.1,NP_116182.2                | 14210.688 1851.3032 | -7.6760455                   | MFSD2A    | major facilitator superfamily domain containing 2A                      |
| NM_001937.4                               | NP_001928.2                               | 788.8827 101.89405  | -7.7421864                   | DPT       | dermatopontin                                                           |

Supplementary Table 2. Continued

| Annotation                                               | Normalized Intensity |           | Fold change<br>(T/ANT ratio) |                                                                                                      |
|----------------------------------------------------------|----------------------|-----------|------------------------------|------------------------------------------------------------------------------------------------------|
|                                                          | ANT                  | T         |                              |                                                                                                      |
| NM_003251.3                                              | 5470.0592            | 695.27622 | -7.8674621                   | thyroid hormone responsive                                                                           |
| NM_194294.2                                              | 2351.9846            | 283.58503 | -8.2937543                   | indoleamine 2,3-dioxygenase 2                                                                        |
| NM_000348.3                                              | 8085.0484            | 959.92997 | -8.4225398                   | steroid-5-alpha-reductase, alpha polypeptide 2 (3-oxo-5 alpha-steroid delta 4-dehydrogenase alpha 2) |
| NM_001178006.1, NM_000331.4, NM_199161.3                 | 3841.246             | 431.52984 | -8.901461                    | serum amyloid A1                                                                                     |
| NM_000612.4, NM_001007139.4, NM_001127598.1, NR_003512.2 | 11073.054            | 1224.3552 | -9.0439885                   | insulin-like growth factor 2 (somatomedin A) INS-IGF2                                                |
| NM_007289.2, NM_007288.2, NM_007287.2, NM_000902.3       | 1780.3813            | 140.80211 | -12.644564                   | membrane metallo-endoropeptidase                                                                     |
| NM_176870.2, NR_036677.1                                 | 15281.01             | 809.92841 | -18.867113                   | metallothionein 1M metallothionein 1J, pseudogene                                                    |
| NM_005952.3                                              | 25432.772            | 1323.486  | -19.216502                   | metallothionein 1X                                                                                   |
| NM_001680.4                                              | 4251.9126            | 137.48589 | -30.926176                   | FXYD domain containing ion transport regulator 2                                                     |

ANT, adjacent non-tumor tissues; HCV, hepatitis C virus; HCC, hepatocellular carcinoma.
