# Supplementary material for: Significant down-regulation of growth hormone receptor expression revealed as a new unfavorable prognostic factor in hepatitis C virus-related hepatocellular carcinoma
Source: PubMed Central journal article supplement — Clin Mol Hepatol. 2020 Dec 14;27(2):313–28. doi: 10.3350/cmh.2020.0247 (PMC8046631; doi:10.3350/cmh.2020.0247), 2020-12-14
Supplement: cmh-2020-0247-suppl3.pdf [file cmh-2020-0247-suppl3.pdf]

**Supplementary Table 3.** Differentially expressed genes in comparisons between tumor and ANT tissues in patients with HCV-related HCC up-regulated genes

| Annotation                                                                                   | Normalized Intensity                                                                         |            | T         | Fold change<br>(T/ANT ratio)                             |  |
|----------------------------------------------------------------------------------------------|----------------------------------------------------------------------------------------------|------------|-----------|----------------------------------------------------------|--|
|                                                                                              | ANT                                                                                          | T          |           |                                                          |  |
| NM_003276.2                                                                                  | NP_003267.1                                                                                  | 279.74423  | 2.14238   | thymopoietin                                             |  |
| NM_001256068.1,NM_001256067.1,NM_0066471                                                     | NP_001242997.1,NP_001242996.1,NP_006638.1                                                    | 3631.021   | 2.4324506 | NADPH oxidase activator 1                                |  |
| NM_006618.3                                                                                  | NP_006609.3                                                                                  | 331.91725  | 2.4714504 | lysine (K)-specific demethylase 5B                       |  |
| NM_033514.4,NM_001205288.1                                                                   | NP_277049.1,NP_001192217.1                                                                   | 6147.0137  | 2.4871008 | LIM and senescent cell antigen-like domains 3            |  |
| NM_052837.2,NM_005698.3                                                                      | NP_443069.1,NP_005689.2                                                                      | 3415.4593  | 2.5082643 | secretory carrier membrane protein 3                     |  |
| NM_016222.2                                                                                  | NP_057306.2                                                                                  | 347.42428  | 2.5286162 | DEAD (Asp-Glu-Ala-Asp) box polypeptide 41                |  |
| NM_001122764.1,NM_000309.3                                                                   | NP_001116236.1,NP_000300.1                                                                   | 484.918315 | 2.5291681 | protoporphyrinogen oxidase                               |  |
| NR_002944.2,NM_001011725.1,NM_001011724.1                                                    | -[NP_001011725.1,NP_001011724.1                                                              | 2895.84514 | 2.6275404 | heterogeneous nuclear ribonucleoprotein A1 pseudogene 10 |  |
| NM_203401.1,NM_203399.1,NM_005563.3                                                          | NP_981946.1,NP_981944.1,NP_005554.1                                                          | 1168.3966  | 2.7313966 | stathmin 1                                               |  |
| NM_001205255.1,NM_001205254.1,NM_0025383                                                     | NP_001192184.1,NP_001192183.1,NP_0025291                                                     | 186.310755 | 2.7387825 | occludin                                                 |  |
| NM_003107.2                                                                                  | NP_003098.1                                                                                  | 117.798594 | 2.7589472 | SOX4                                                     |  |
| NM_001012271.1,NM_001012270.1,NM_01168.2                                                     | NP_001012271.1,NP_001012270.1,NP_001159.2                                                    | 202.00725  | 2.7941144 | BIRC5                                                    |  |
| NM_005733.2                                                                                  | NP_005724.1                                                                                  | 176.944789 | 2.7961921 | KIF20A                                                   |  |
| NM_202004.3,NM_145277.4,NM_213652.3,NM_213653.3,XM_003960176.1,XM_003960175.1,XM_003960174.1 | NP_973733.1,NP_660320.3,NP_998817.1,NP_998818.1,XP_003960225.1,XP_003960224.1,XP_003960223.1 | 8471.29863 | 2.7974458 | HFE2 LOC101060525 (juvenile)hemojuvelin-like             |  |
| NM_001201326.1,NM_001201325.1,NM_02614.4                                                     | NP_001188255.1,NP_001188254.1,NP_002605.2                                                    | 4046.83529 | 2.8316178 | PDZK1                                                    |  |
| NM_001395.2                                                                                  | NP_001386.1                                                                                  | 82.5401052 | 2.8961138 | DUSP9                                                    |  |
| NM_153357.1                                                                                  | NP_699188.1                                                                                  | 345.493703 | 2.9271331 | SLC16A11                                                 |  |
| NM_005318.3                                                                                  | NP_005309.1                                                                                  | 545.221841 | 2.9472199 | H1FO                                                     |  |
| NM_006051.3,NM_133174.2,NM_133173.2,NM_133172.2                                              | NP_006042.3,NP_573420.2,NP_573419.2,NP_573418.2                                              | 143.760751 | 3.0244376 | APBB3                                                    |  |
| NM_018457.3,NM_001005354.2                                                                   | NP_060927.1,NP_001005354.1                                                                   | 155.854177 | 3.0636466 | PRR13                                                    |  |
| NM_002105.2                                                                                  | NP_002096.1                                                                                  | 903.61204  | 2.817523  | H2AFX                                                    |  |
| NM_001813.2                                                                                  | NP_001804.2                                                                                  | 207.63974  | 3.124638  | CENPE                                                    |  |
| NM_006651.3                                                                                  | NP_006642.1                                                                                  | 284.644816 | 3.1250391 | CPLX1                                                    |  |
| NM_001185023.1,NM_001185022.1,NM_001307.5                                                    | NP_001171952.1,NP_001171951.1,NP_0012983                                                     | 401.992045 | 3.1342969 | CLDN7                                                    |  |

Supplementary Table 3. Continued

| Annotation                                         | Normalized Intensity                               |            | Fold change<br>(T/ANT ratio) |                                                                     |
|----------------------------------------------------|----------------------------------------------------|------------|------------------------------|---------------------------------------------------------------------|
|                                                    | ANT                                                | T          |                              |                                                                     |
| NM_014873.2                                        | NP_055688.1                                        | 643.950155 | 2084.4993                    | LPGAT1<br>lysophosphatidylglycerol acyltransferase<br>1             |
| NM_001145364.1,NM_148913.2,NM_148912.2,NR_026910.1 | NP_001138836.1,NP_683711.1,NP_683710.1,-           | 147.070953 | 481.03811                    | ABHD11<br>abhydrolase domain containing 11                          |
| NM_001025603.1,NM_000449.3                         | NP_001020774.1,NP_000440.1                         | 684.342529 | 2243.1175                    | RFX5<br>regulatory factor X, 5 (influences HLA class II expression) |
| NM_000780.3                                        | NP_000771.2                                        | 399.911138 | 1311.833                     | CYP7A1<br>cytochrome P450, family 7, subfamily A, polypeptide 1     |
| NM_001190.3,NM_001164773.1,NR_028451.1,NR_028450.1 | NP_001181.2,NP_001158245.1,-                       | 323.131887 | 1060.0026                    | BCAT2<br>branched chain amino-acid transaminase 2, mitochondrial    |
| NM_005761.2,NR_037687.1                            | NP_005752.1,-                                      | 125.301753 | 431.42776                    | PLXNC1<br>plexin C1                                                 |
| NM_015714.3                                        | NP_056529.1                                        | 11827.1061 | 42194.82                     | G0S2<br>G0/Giswitch 2                                               |
| NM_001048201.1,NM_013282.3                         | NP_001041666.1,NP_037414.3                         | 130.292023 | 466.62294                    | UHRF1<br>ubiquitin-like with PHD and ring finger domains 1          |
| NM_012291.4                                        | NP_036423.4                                        | 218.340607 | 802.08236                    | ESPL1<br>extra spindle pole bodies homolog 1 (S. cerevisiae)        |
| NM_000077.4,NM_058197.4,NM_058195.3,NM_001195132.1 | NP_000068.1,NP_478104.2,NP_478102.2,NP_001182061.1 | 118.280886 | 442.1714                     | CDKN2A<br>cyclin-dependent kinase inhibitor 2A                      |
| NM_001113482.1,NM_001031740.2,NM_152496.2          | NP_001106954.1,NP_001026910.1,NP_689709.1          | 226.971675 | 849.13019                    | MANEAL<br>mannosidase, endo-alpha-like                              |
| NM_005397.3,NM_001018111.2                         | NP_005388.2,NP_001018121.1                         | 935.900189 | 3549.6427                    | PODXL<br>podocalyxin-like                                           |
| NR_024345.1                                        | -                                                  | 765.161133 | 2934.5989                    | HNFI1A-AS1<br>HNFI1A antisense RNA 1                                |
| NM_001034077.4,NM_003548.2                         | NP_001029249.1,NP_0035539.1                        | 513.783712 | 1974.7767                    | HIST2H4B HIST2H4A<br>histone cluster 2, H4b histone cluster 2, H4a  |
| NM_001846.2                                        | NP_001837.2                                        | 682.332296 | 2765.2916                    | COL4A2<br>collagen, type IV, alpha 2                                |
| NM_031310.1                                        | NP_112600.1                                        | 373.150696 | 1513.1998                    | PLVAP<br>plasmalemma vesicle associated protein                     |
| NM_014736.4                                        | NP_055551.1                                        | 305.352748 | 1274.3246                    | KIAA0101<br>KIAA0101                                                |
| NM_001244714.1,NM_18291.3                          | NP_001231643.1,NP_00106882.1,NP_060761.3           | 6541.2072  | 27461.104                    | FGGY<br>FGGY carbohydate kinase domain containing                   |
| NM_002668.2                                        | NP_002659.1                                        | 317.308421 | 1407.1167                    | PLP2<br>proteolipid protein 2 (colonic epithelium-enriched)         |
| NM_004961.3                                        | NP_004952.2                                        | 100.6084   | 448.75281                    | GABRE<br>gamma-aminobutyric acid (GABA) A receptor, epsilon         |
| NM_001007225.1,NM_006548.4                         | NP_001007226.1,NP_006539.3                         | 369.786122 | 1669.6744                    | IGF2BP2<br>insulin-like growth factor 2 mRNA binding protein 2      |
| NM_001276.2                                        | NP_001267.2                                        | 4855.98438 | 22026.442                    | CHI3L1<br>chitinase 3-like 1 (cartilage glycoprotein-39)            |

Supplementary Table 3. Continued

| Annotation                                                                                                                  | Normalized Intensity                                                                                 |            | Fold change<br>(T/ANT ratio) | Family with sequence similarity                                   |
|-----------------------------------------------------------------------------------------------------------------------------|------------------------------------------------------------------------------------------------------|------------|------------------------------|-------------------------------------------------------------------|
|                                                                                                                             | ANT                                                                                                  | T          |                              |                                                                   |
| NM_152421.3                                                                                                                 | NP_689634.2                                                                                          | 1307.3205  | 4.5422421                    | FAM69B family with sequence similarity 69, member B               |
| NM_001015050.2,NM_001195223.1                                                                                               | NP_001015050.2,NP_001182152.1                                                                        | 1610.1932  | 4.6013066                    | ALG1L asparagine-linked glycosylation 1-like                      |
| NM_000094.3                                                                                                                 | NP_000085.1                                                                                          | 1304.2555  | 4.629419                     | COL7A1 collagen, type VII, alpha 1                                |
| NM_001039349.2,NM_001039348.2                                                                                               | NP_001034438.1,NP_001034437.1                                                                        | 471.5403   | 4.7423682                    | EFEMP1 EGF containing fibulin-like extracellular matrix protein 1 |
| NM_001206897.1,NM_170697.2,NM_170696.2,NM_003888.3                                                                          | NP_001193826.1,NP_733798.1,NP_733797.1,NP_0038879.2                                                  | 551.59743  | 4.8030855                    | ALDH1A2 aldehyde dehydrogenase 1 family, member A2                |
| NM_012112.4                                                                                                                 | NP_036244.2                                                                                          | 1239.9312  | 4.8352317                    | TPX2 TPX2, microtubule-associated, homolog (Xenopus laevis)       |
| NM_002256.3                                                                                                                 | NP_002247.3                                                                                          | 760.92379  | 5.0096605                    | KISS1 KISS-1 metastasis-suppressor                                |
| NM_001845.4                                                                                                                 | NP_001836.2                                                                                          | 2587.2798  | 5.1700078                    | COL4A1 collagen, type IV, alpha 1                                 |
| NM_014059.2                                                                                                                 | NP_054778.2                                                                                          | 1630.0894  | 5.3355508                    | RGCC regulator of cell cycle                                      |
| NM_001243144.1,NM_001243143.1,NM_001243142.1,NM_018454.7,NM_016359.4                                                        | NP_001230073.1,NP_001230072.1,NP_001230071.1,NP_060924.4,NP_057443.2                                 | 2516.8003  | 5.4316743                    | NUSAP1 nucleolar and spindle associated protein 1                 |
| NM_006578.3,NM_016194.3                                                                                                     | NP_0065691,NP_057278.2                                                                               | 1915.7571  | 5.5266816                    | GNB5 guanine nucleotide binding protein (G protein), beta 5       |
| NM_001130046.1,NM_004591.2                                                                                                  | NP_001123518.1,NP_004582.1                                                                           | 4017.9552  | 5.5486292                    | CCL20 chemokine (C-C motif) ligand 20                             |
| NM_080668.3                                                                                                                 | NP_542399.1                                                                                          | 666.07443  | 5.6495308                    | CDC45 cell division cycle associated 5                            |
| NM_014176.3                                                                                                                 | NP_054895.1                                                                                          | 2029.8227  | 5.7779141                    | UBE2T ubiquitin-conjugating enzyme E2T (putative)                 |
| NM_020675.3                                                                                                                 | NP_065726.1                                                                                          | 406.84262  | 5.7802946                    | SPC25 SPC25, NDC80 kinetochore complex component                  |
| NM_001165931.1,NM_001034.3                                                                                                  | NP_001159403.1,NP_001025.1                                                                           | 1020.0453  | 6.3385861                    | RRM2 ribonucleotide reductase M2                                  |
| NM_001042426.1,NM_001809.3                                                                                                  | NP_001035891.1,NP_001800.1                                                                           | 593.07788  | 6.8761897                    | CENPA centromere protein A                                        |
| NM_000089.3                                                                                                                 | NP_000080.2                                                                                          | 144.197159 | 6.98554                      | COL1A2 collagen, type I, alpha 2                                  |
| NM_001067.3                                                                                                                 | NP_001058.2                                                                                          | 836.73513  | 8.2117881                    | TOP2A topoisomerase (DNA II) alpha 170kDa                         |
| NM_001823.4                                                                                                                 | NP_001814.2                                                                                          | 709.21074  | 8.9905542                    | CKB creatine kinase, brain                                        |
| NM_001270551.1,NR_073039.1,NM_001270552.1,NM_00101233.2,NM_00101233.1,NM_00101233.2,NM_00101233.1,NM_00101233.2,NM_002391.4 | NP_001257480.1,-NP_001257481.1,NP_001257482.1,NP_0012333.1,NP_001012334.1,NP_001257479.1,NP_002382.1 | 379.70988  | 12.693109                    | MDK midkine (neurite growth-promoting factor 2)                   |
| NM_001958.3                                                                                                                 | NP_001949.1                                                                                          | 4317.3675  | 37.258528                    | EEF1A2 eukaryotic translation elongation factor 1 alpha 2         |
| NM_001164619.1,NM_001164618.1,NM_001164617.1,NM_004484.3                                                                    | NP_001158091.1,NP_001158090.1,NP_001158089.1,NP_004475.1                                             | 30933.573  | 68.770324                    | GPC3 glypican 3                                                   |

ANT, adjacent non-tumor tissues; HCV, hepatitis C virus; HCC, hepatocellular carcinoma.
