# Supplementary material for: Significant down-regulation of growth hormone receptor expression revealed as a new unfavorable prognostic factor in hepatitis C virus-related hepatocellular carcinoma
Source: PubMed Central journal article supplement — Clin Mol Hepatol. 2020 Dec 14;27(2):313–28. doi: 10.3350/cmh.2020.0247 (PMC8046631; doi:10.3350/cmh.2020.0247), 2020-12-14
Supplement: cmh-2020-0247-suppl4.pdf [file cmh-2020-0247-suppl4.pdf]

**Supplementary Table 4.** Summary of candidate genes expression level analyzed by real-time PCR in HCV-HCC patients

| Expression level ( $2^{-\Delta Ct}$ ) | Tumor part  | Adjacent non-tumor part | P-value |
|---------------------------------------|-------------|-------------------------|---------|
| GHR (n=200)                           | 2.557±5.341 | 15.780±20.591           | <0.0001 |
| IGF-1 (n=200)                         | 0.161±0.431 | 0.359±0.608             | <0.0001 |
| CDKN1A (n=200)                        | 0.836±1.267 | 1.698±2.439             | <0.0001 |

Values are presented as mean±standard deviation.

PCR, polymerase chain reaction; HCV, hepatitis C virus; HCC, hepatocellular carcinoma; GHR, growth hormone receptor; IGF-1, insulin-like growth factor-1; CDKN1A, cyclin-dependent kinase inhibitor 1A.
