# Supplementary material for: Significant down-regulation of growth hormone receptor expression revealed as a new unfavorable prognostic factor in hepatitis C virus-related hepatocellular carcinoma
Source: PubMed Central journal article supplement — Clin Mol Hepatol. 2020 Dec 14;27(2):313–28. doi: 10.3350/cmh.2020.0247 (PMC8046631; doi:10.3350/cmh.2020.0247), 2020-12-14
Supplement: cmh-2020-0247-suppl5.pdf [file cmh-2020-0247-suppl5.pdf]

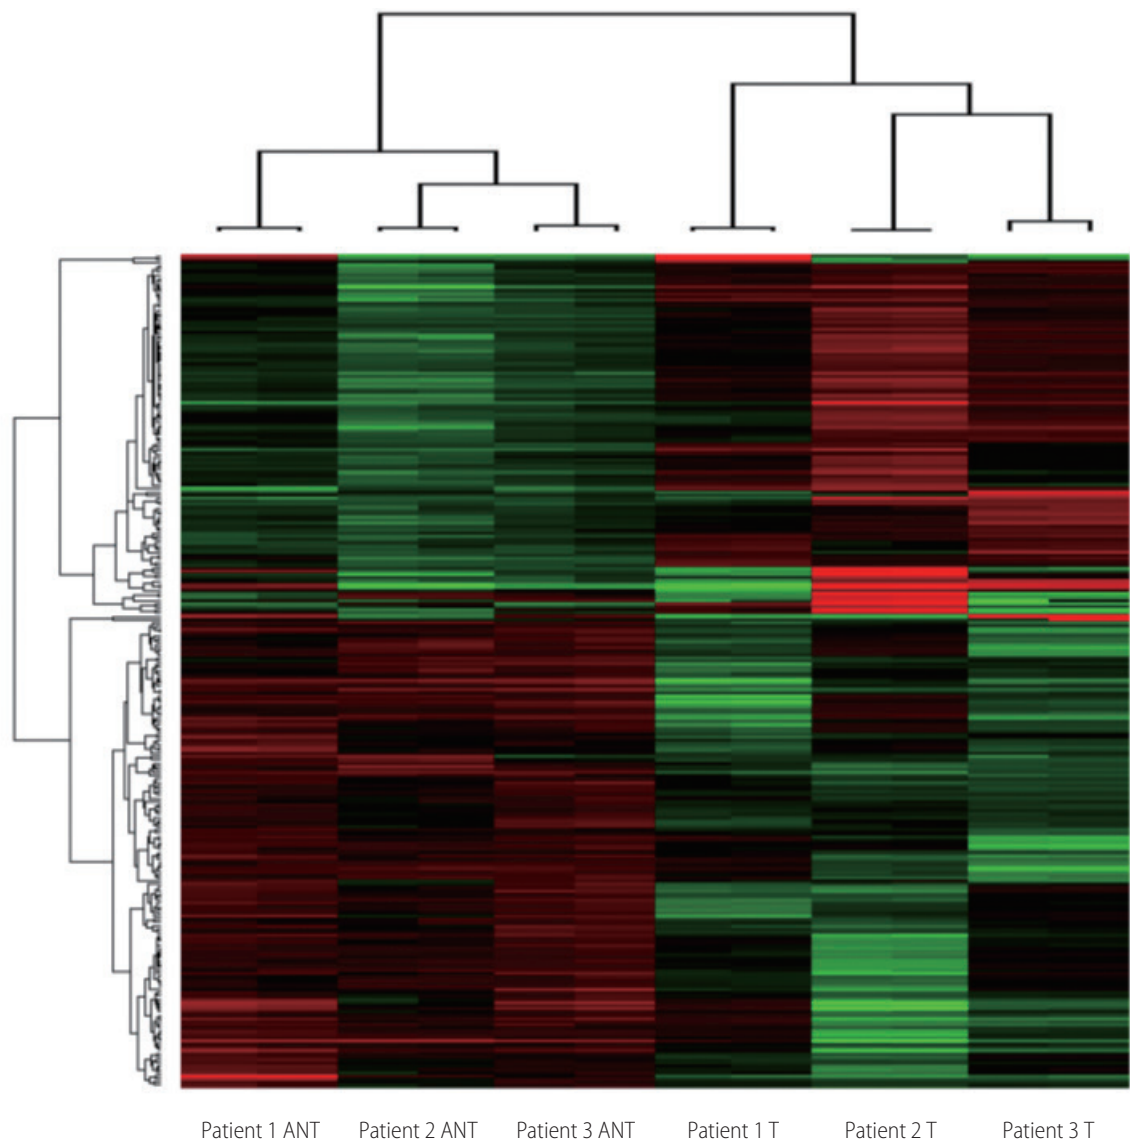

**Supplementary Figure 1.** Differential expression profile of host genes between tumor and ANT tissues in patients with HCV-related HCC. Clustering was performed to visualize the correlations among the replicates and varying sample conditions. Up- and down-regulated genes (fold change  $\geq 2$ ,  $P < 0.05$ ) are represented in red and green colors, respectively. ANT, adjacent non-tumor tissues; HCV, hepatitis C virus; HCC, hepatocellular carcinoma.
