# Supplementary material for: Significant down-regulation of growth hormone receptor expression revealed as a new unfavorable prognostic factor in hepatitis C virus-related hepatocellular carcinoma
Source: PubMed Central journal article supplement — Clin Mol Hepatol. 2020 Dec 14;27(2):313–28. doi: 10.3350/cmh.2020.0247 (PMC8046631; doi:10.3350/cmh.2020.0247), 2020-12-14
Supplement: cmh-2020-0247-suppl6.pdf [file cmh-2020-0247-suppl6.pdf]

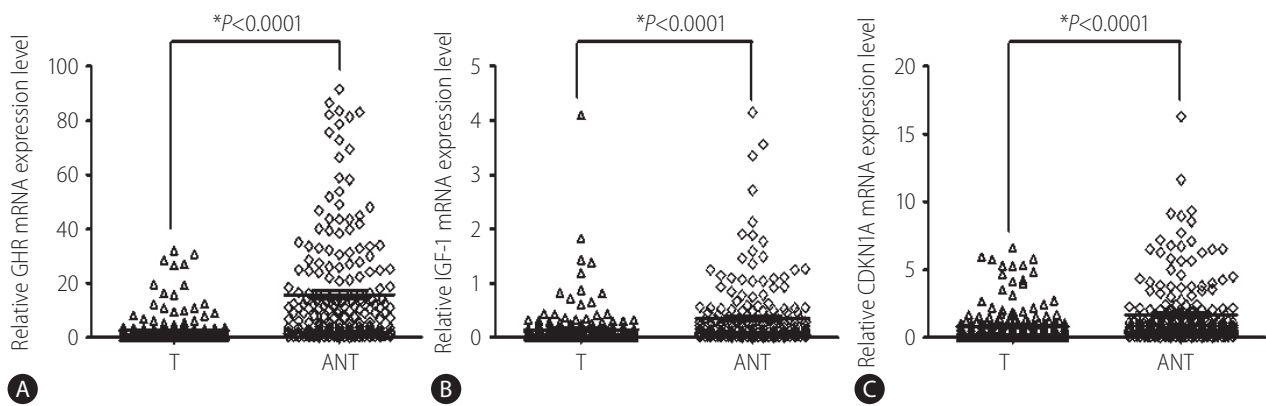

**Supplementary Figure 2.** The expression levels of GHR, IGF-1, and CDKN1A in paired T and ANT in HCC patients with chronic hepatitis C, analyzed by RT-qPCR. The mRNA levels of (A) GHR, (B) IGF-1, and (C) CDKN1A in 200 paired T and ANT in HCC patients with chronic hepatitis C were determined by RT-qPCR. GHR, growth hormone receptor; T, tumor tissues; ANT, adjacent non-tumor tissues; IGF-1, insulin-like growth factor-1; HCV, hepatitis C virus; HCC, hepatocellular carcinoma; RT-qPCR, quantitative real-time polymerase chain reaction. \* $P < 0.0001$ .
